# Supplementary material for: Projections of seasonal patterns in temperature- related deaths for Manhattan, New York
Source: Springer Nature journal article supplement (doi:10.1038/nclimate1902), 2013-05-19
Supplement: 41558_2013_BFnclimate1902_MOESM353_ESM.pdf [file 41558_2013_BFnclimate1902_MOESM353_ESM.pdf]

## PROJECTIONS OF SEASONAL PATTERNS IN TEMPERATURE-RELATED DEATHS FOR MANHATTAN, NEW YORK

***Exposure-Response Modeling***

A statistical model was developed using Poisson GLM regression with log daily non-accidental death counts as the outcome variable and the following predictors: a spline function of daily  $T_{\max}$ , a natural spline of time with 7 degrees of freedom per year, and a day of week indicator variable. The temperature spline was included in the Poisson model with 3 degrees of freedom.

The Poisson GLM regression model had the form:

$$\log(\mu_t) = ns(T_{lag}, 3) + ns(time_t, 7 * 18) + dow \quad (1)$$

where:

$\mu_t$  is the expected mortality on day t

$T_{lag}$  is the daily  $T_{\max}$  for specific lag from day t

$time_t$  is a variable indicating the actual day within the study

$dow$  is an indicator variable indicating the day of the week

$ns(T_{lag}, 3)$  is a natural spline smooth function with 3 degrees of freedom for the daily

$T_{\max}$  for specific lag from day t.

$ns(time_t, 7*18)$  is a natural spline smooth function with 7degrees of freedom per year,

to control for seasonal cycles and longer term temporal trends in mortality.

Based on exploratory analyses in which the model was fitted using different lags of single day temperatures between lags 0 and 5, we selected a lag of 0 for the effect of hot temperatures and a lag of 2 for the effect of cold temperatures. These lags were chosen based on visual examination of plots of the temperature-mortality functions, selecting the minimum lags that appeared to capture the heat and cold effects with the tightest confidence intervals. The fitted non-linear splines for cold and hot temperatures, and their 95 percent confidence intervals, were used in the subsequent health impact assessment to project mortality in response to future temperatures. We also defined a healthy temperature range within which no effects were assumed of temperature on mortality. The healthy temperature range was determined by the points on the temperature scale at which the lower 95 percent confidence intervals of the hot- and cold-related splines no longer included zero risk of mortality. In this way, we limited our estimates of temperature-related mortality to temperatures that were statistically significantly associated with excess mortality in the observed data. The statistical model and analysis were produced in R v.2.10.0.

**Supplemental Table 1. Global Climate Models Used in This Study**

| <b>Climate Model Acronym</b> | <b>Institution</b>                                          | <b>Atmospheric Resolution (latitude × longitude)</b> |
|------------------------------|-------------------------------------------------------------|------------------------------------------------------|
| BCCR                         | Bjerknes Center for Climate Research                        | 1.9×1.9                                              |
| CCSM                         | National Center for Atmospheric Research, USA               | 1.4×1.4                                              |
| CGCM                         | Canadian Center for Climate Modeling and Analysis , Canada  | 2.8×2.8                                              |
| CNRM                         | National Weather Research Center, METEO-FRANCE, France      | 2.8×2.8                                              |
| CSIRO                        | CSIRO Atmospheric Research, Australia                       | 1.9×1.9                                              |
| ECHAM5                       | Max Planck Institute for Meteorology, Germany               | 1.9×1.9                                              |
| ECHO-G                       | Meteorological Institute of the University of Bonn, Germany | 3.75×3.75                                            |
| GFDL-CM2.0                   | Geophysical Fluid Dynamics Laboratory, USA                  | 2.0×2.5                                              |
| GFDL-CM2.1                   | Geophysical Fluid Dynamics Laboratory, USA                  | 2.0×2.5                                              |
| GISS                         | NASA Goddard Institute for Space Studies                    | 4.0×5.0                                              |
| INMCM                        | Institute for Numerical Mathematics, Russia                 | 4.0×5.0                                              |
| IPSL                         | Pierre Simon Laplace Institute, France                      | 2.5×3.75                                             |
| MIROC                        | Frontier Research Center for Global Change, Japan           | 2.8×2.8                                              |
| MRI                          | Meteorological Research Institute, Japan                    | 2.8×2.8                                              |
| PCM                          | National Center for Atmospheric Research, USA               | 2.8×2.8                                              |
| UKMO-HadCM3                  | Hadley Center for Climate Prediction, Met Office, UK        | 2.5×3.75                                             |

**Predicted Mortality vs. Maximum Temperature (lag=0)  
New York, NY**

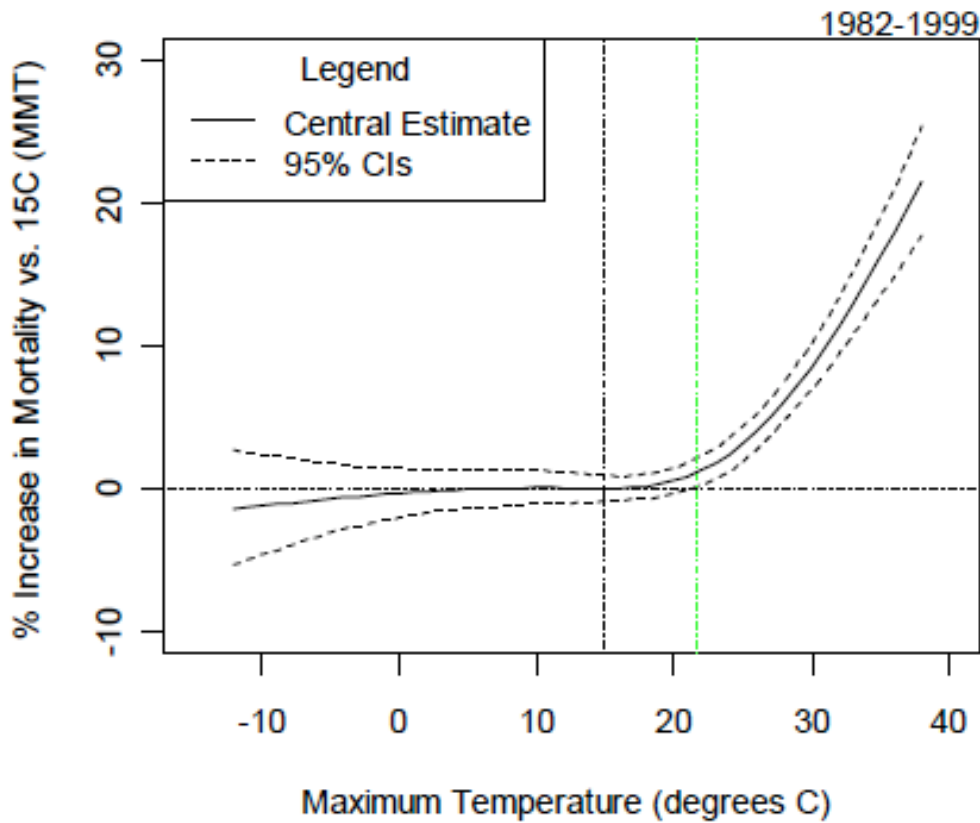

**Supplemental Figure 1. Mortality~Maximum Temperature Exposure-Response Curve with Single Day Temperature Lag 0.** The curved solid line shows the central estimate. The curved dashed line shows the 95% confident interval. The minimum mortality temperature is 15.0 °C, indicated by the vertical black line. The vertical green line indicates the temperature (21.7 °C) above which the mortality effect was statistically significant.

### Predicted Mortality vs. Maximum Temperature (lag=2) New York, NY

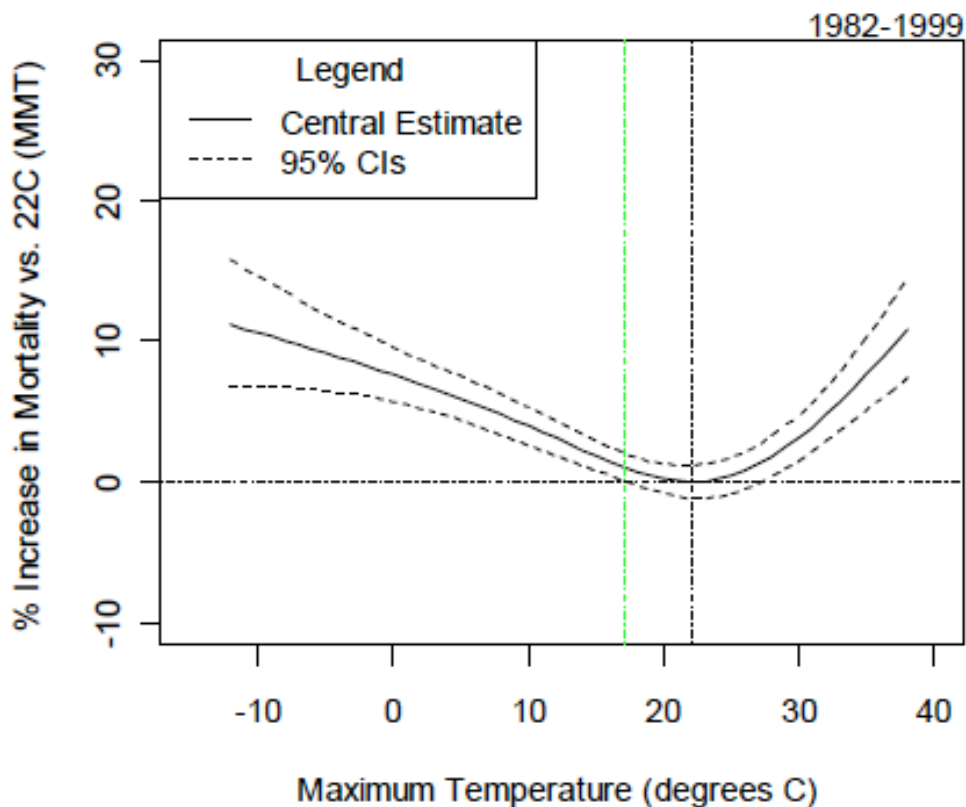

**Supplemental Figure 2. Mortality~Maximum Temperature Exposure-Response Curve with Single Day Temperature Lag 2.** The curved solid line shows the central estimate. The curved dashed line shows the 95% confident interval. The minimum mortality temperature is 22.2 °C, indicated by the vertical black line. The vertical green line indicates the temperature (17.2 °C) below which the mortality effect was statistically significant.

**Supplemental Table 2. Summary of Projected Annual Mean Daily Maximum Temperature and Associated Additional Deaths in the 1980s versus the 2020s, 2050s, 2080s A2 and B1 Scenarios**

|          |                       | Net Effect                     | Heat Effect           |                                | Cold Effect           |                                |
|----------|-----------------------|--------------------------------|-----------------------|--------------------------------|-----------------------|--------------------------------|
|          |                       | Additional Deaths <sup>a</sup> | N of Days Above 71 °F | Additional Deaths <sup>a</sup> | N of Days Below 63 °F | Additional Deaths <sup>a</sup> |
| 1980s    | Baseline <sup>b</sup> | 709                            | 143                   | 369                            | 182                   | 340                            |
| 2020s A2 | BCCR                  | 715                            | 148                   | 406                            | 170                   | 309                            |
| 2020s B1 |                       | 715                            | 149                   | 410                            | 169                   | 305                            |
| 2050s A2 |                       | 763                            | 161                   | 494                            | 155                   | 269                            |
| 2050s B1 |                       | 733                            | 154                   | 446                            | 163                   | 288                            |
| 2080s A2 |                       | 849                            | 178                   | 609                            | 141                   | 240                            |
| 2080s B1 |                       | 783                            | 161                   | 508                            | 157                   | 274                            |
| 2020s A2 | CCSM                  | 749                            | 156                   | 456                            | 162                   | 293                            |
| 2020s B1 |                       | 742                            | 158                   | 459                            | 159                   | 283                            |
| 2050s A2 |                       | 820                            | 172                   | 570                            | 146                   | 250                            |
| 2050s B1 |                       | 756                            | 163                   | 493                            | 154                   | 263                            |
| 2080s A2 |                       | 918                            | 186                   | 704                            | 133                   | 214                            |
| 2080s B1 |                       | 775                            | 162                   | 500                            | 156                   | 275                            |
| 2020s A2 | CGCM                  | 764                            | 155                   | 465                            | 166                   | 299                            |
| 2020s B1 |                       | 763                            | 153                   | 457                            | 168                   | 306                            |
| 2050s A2 |                       | 823                            | 168                   | 565                            | 151                   | 259                            |
| 2050s B1 |                       | 783                            | 160                   | 509                            | 158                   | 273                            |
| 2080s A2 |                       | 947                            | 187                   | 737                            | 131                   | 210                            |
| 2080s B1 |                       | 826                            | 168                   | 562                            | 153                   | 264                            |
| 2020s A2 | CNRM                  | 749                            | 152                   | 441                            | 169                   | 749                            |
| 2020s B1 |                       | 736                            | 152                   | 434                            | 166                   | 302                            |
| 2050s A2 |                       | 803                            | 162                   | 525                            | 159                   | 278                            |
| 2050s B1 |                       | 771                            | 159                   | 482                            | 162                   | 289                            |
| 2080s A2 |                       | 910                            | 179                   | 671                            | 142                   | 239                            |
| 2080s B1 |                       | 796                            | 162                   | 519                            | 158                   | 277                            |
| 2020s A2 | CSIRO                 | 724                            | 151                   | 430                            | 167                   | 294                            |
| 2020s B1 |                       | 712                            | 149                   | 421                            | 168                   | 291                            |
| 2050s A2 |                       | 753                            | 158                   | 494                            | 157                   | 259                            |
| 2050s B1 |                       | 742                            | 153                   | 456                            | 165                   | 286                            |
| 2080s A2 |                       | 822                            | 172                   | 605                            | 143                   | 217                            |
| 2080s B1 |                       | 753                            | 156                   | 483                            | 162                   | 270                            |

|          |            |      |     |     |     |     |
|----------|------------|------|-----|-----|-----|-----|
| 2020s A2 | ECHAM5     | 729  | 149 | 416 | 170 | 313 |
| 2020s B1 |            | 742  | 150 | 434 | 169 | 308 |
| 2050s A2 |            | 812  | 163 | 537 | 158 | 275 |
| 2050s B1 |            | 786  | 160 | 504 | 160 | 282 |
| 2080s A2 |            | 934  | 183 | 699 | 140 | 235 |
| 2080s B1 |            | 859  | 169 | 597 | 151 | 262 |
| 2020s A2 | ECHO-G     | 775  | 156 | 478 | 163 | 296 |
| 2020s B1 |            | 786  | 157 | 482 | 163 | 304 |
| 2050s A2 |            | 846  | 169 | 591 | 150 | 255 |
| 2050s B1 |            | 825  | 163 | 550 | 156 | 276 |
| 2080s A2 |            | 978  | 186 | 764 | 135 | 215 |
| 2080s B1 |            | 878  | 173 | 626 | 148 | 251 |
| 2020s A2 | GFDL-CM2.0 | 796  | 152 | 487 | 168 | 309 |
| 2020s B1 |            | 794  | 156 | 488 | 166 | 306 |
| 2050s A2 |            | 880  | 166 | 618 | 153 | 262 |
| 2050s B1 |            | 852  | 162 | 564 | 160 | 289 |
| 2080s A2 |            | 1050 | 184 | 831 | 136 | 220 |
| 2080s B1 |            | 854  | 164 | 587 | 156 | 267 |
| 2020s A2 | GFDL-CM2.1 | 770  | 153 | 465 | 168 | 305 |
| 2020s B1 |            | 757  | 153 | 460 | 167 | 297 |
| 2050s A2 |            | 830  | 164 | 557 | 157 | 272 |
| 2050s B1 |            | 817  | 161 | 534 | 159 | 284 |
| 2080s A2 |            | 953  | 178 | 723 | 143 | 230 |
| 2080s B1 |            | 842  | 167 | 573 | 155 | 269 |
| 2020s A2 | GISS       | 737  | 151 | 421 | 168 | 316 |
| 2020s B1 |            | 740  | 153 | 434 | 166 | 306 |
| 2050s A2 |            | 766  | 160 | 482 | 160 | 283 |
| 2050s B1 |            | 746  | 154 | 444 | 165 | 302 |
| 2080s A2 |            | 825  | 174 | 583 | 145 | 242 |
| 2080s B1 |            | 765  | 158 | 469 | 161 | 296 |
| 2020s A2 | INMCM      | 782  | 156 | 489 | 163 | 292 |
| 2020s B1 |            | 775  | 153 | 476 | 166 | 300 |
| 2050s A2 |            | 847  | 163 | 581 | 157 | 266 |
| 2050s B1 |            | 821  | 159 | 531 | 163 | 290 |
| 2080s A2 |            | 971  | 178 | 740 | 142 | 230 |
| 2080s B1 |            | 821  | 162 | 553 | 155 | 268 |
| 2020s A2 | IPSL       | 741  | 157 | 458 | 163 | 283 |
| 2020s B1 |            | 736  | 158 | 454 | 162 | 282 |
| 2050s A2 |            | 818  | 174 | 582 | 143 | 237 |
| 2050s B1 |            | 793  | 168 | 537 | 151 | 257 |
| 2080s A2 |            | 939  | 194 | 755 | 123 | 184 |

|          |             |      |     |     |     |     |
|----------|-------------|------|-----|-----|-----|-----|
| 2080s B1 |             | 849  | 176 | 616 | 142 | 232 |
| 2020s A2 | MIROC       | 759  | 154 | 465 | 163 | 294 |
| 2020s B1 |             | 751  | 155 | 463 | 162 | 288 |
| 2050s A2 |             | 830  | 170 | 579 | 148 | 251 |
| 2050s B1 |             | 809  | 167 | 541 | 154 | 268 |
| 2080s A2 |             | 958  | 193 | 771 | 124 | 187 |
| 2080s B1 |             | 847  | 172 | 604 | 146 | 243 |
| 2020s A2 | MRI         | 726  | 149 | 416 | 170 | 310 |
| 2020s B1 |             | 720  | 151 | 420 | 170 | 300 |
| 2050s A2 |             | 824  | 163 | 537 | 163 | 287 |
| 2050s B1 |             | 764  | 156 | 470 | 164 | 294 |
| 2080s A2 |             | 937  | 183 | 699 | 145 | 238 |
| 2080s B1 |             | 779  | 162 | 508 | 157 | 271 |
| 2020s A2 | PCM         | 754  | 154 | 451 | 167 | 303 |
| 2020s B1 |             | 740  | 151 | 441 | 168 | 298 |
| 2050s A2 |             | 786  | 157 | 496 | 163 | 291 |
| 2050s B1 |             | 763  | 155 | 474 | 164 | 289 |
| 2080s A2 |             | 828  | 168 | 572 | 151 | 256 |
| 2080s B1 |             | 794  | 159 | 514 | 161 | 281 |
| 2020s A2 | UKMO-HadCM3 | 777  | 155 | 468 | 167 | 309 |
| 2020s B1 |             | 734  | 151 | 436 | 168 | 298 |
| 2050s A2 |             | 880  | 165 | 606 | 156 | 273 |
| 2050s B1 |             | 816  | 166 | 549 | 153 | 268 |
| 2080s A2 |             | 1033 | 186 | 810 | 136 | 224 |
| 2080s B1 |             | 869  | 173 | 633 | 145 | 237 |

<sup>a</sup> Central effect estimate for the net temperature, cold- and heat- related additional deaths in a typical period.

<sup>b</sup> Baseline means 1980s (1970-1999) reference period.



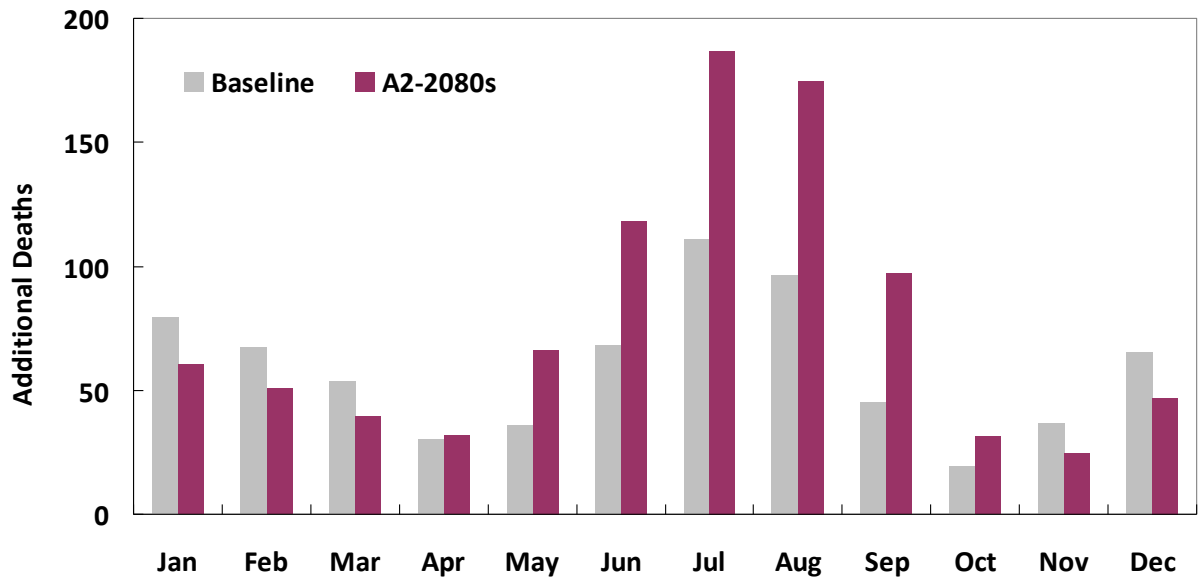

**Supplemental Figure 3. Projected Monthly Additional Deaths in the 1980s versus the 2080s under A2 Scenario.** 1980s is the reference period. The largest absolute changes occurred in summer and winter.

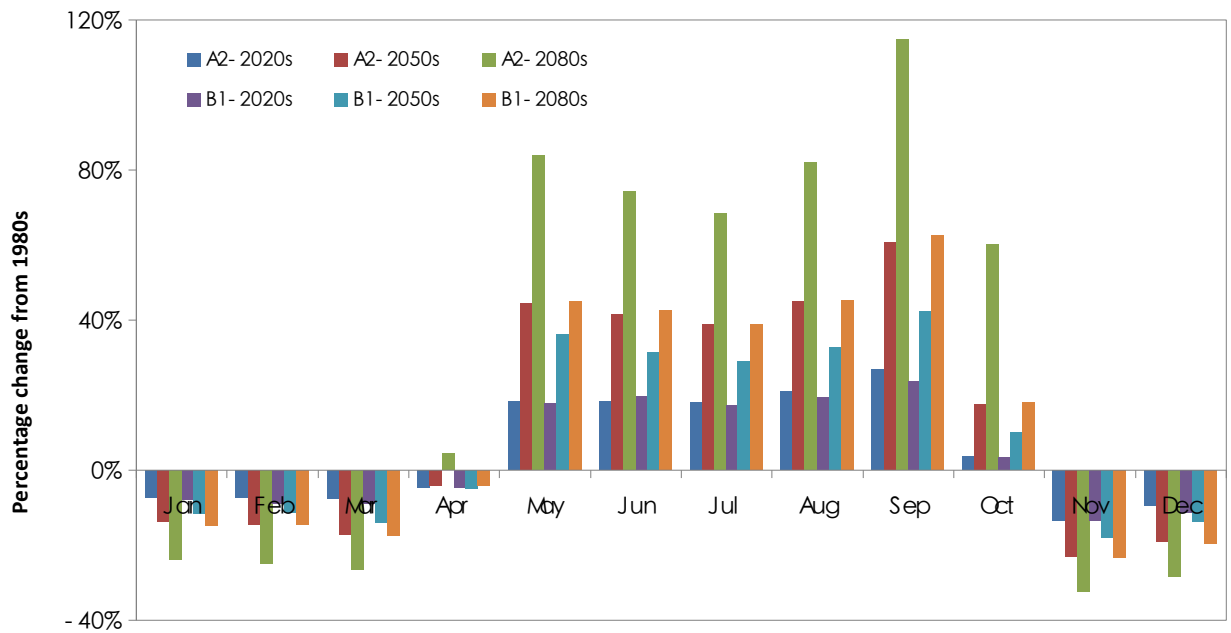

**Supplemental Figure 4. Projected Percentage Change of Monthly Additional Deaths in the 1980s versus the 2020s, 2050s and 2080s under A2 and B1 Scenarios.** 1980s is the reference period. September and May show the largest increase.

### Supplementary Sensitivity Analyses

We analyzed the temperature-mortality relationship used the Distributed Lag Nonlinear Model (DLNM). We then used sensitivity analyses to examine inclusion of PM<sub>10</sub>, ozone, influenza, dewpoint temperature. We also tested the robustness of results to the different lag structures.

To quantify the heat and cold effects, we calculated the change in mortality risk comparing the 99<sup>th</sup> to 95<sup>th</sup> percentile (heat effect) and the 1<sup>st</sup> to 5<sup>th</sup> percentile (cold effect) of the temperature distribution.

### ***Distributed Lag Nonlinear Model (DLNM)***

We re-analyzed the temperature-mortality relationship using the DLNM package in R to explore non-linear distributed lags. This provided another point of comparison with our simple modeling approach, which was based on single-day lags of zero days for heat and two days for cold effects. The DLNM model examined non-linear temperature effects across the full range of temperatures and up to a maximum lag of 30 days. The results are shown below in Supplemental Figure 5. Findings confirmed that the heat effect was maximal at lag zero and diminished rapidly beyond lag two. The cold effect was distributed over lags one through four, and maximal at lag two.

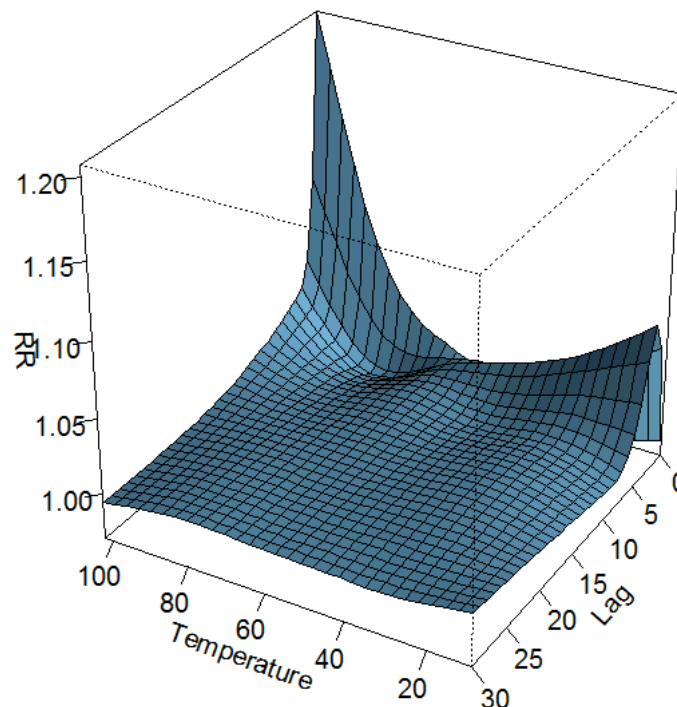

**Supplemental Figure 5. 3-D Plot of RR along Temperature and Lags with DLNM. Note that this plot displays temperatures in degrees F.**

## *Inclusion of PM<sub>10</sub>, Ozone, Influenza and Dewpoint Temperature*

### *Dataset Description*

We complemented the data of PM<sub>10</sub>, ozone, influenza and dewpoint temperature from NMMAPS dataset which started from 1987. We used three dataset in this study. Supplemental Table 3 showed the description of the datasets.

**Supplemental Table 3. Description of the Datasets**

| Number of dataset | Time period | Description                                 |
|-------------------|-------------|---------------------------------------------|
| Dataset 1         | 1982-1999   | Include total 6574 days                     |
| Dataset 2         | 1987-1999   | Include total 4748 days                     |
| Dataset 3         | 1987-1999   | Include 791 days with PM <sub>10</sub> data |

For subsets of days in our study period (6574 days from 1982-1999), we were able to obtain data on daily concentrations of PM<sub>10</sub> (791 days from 1987-1999) and ozone (4748 days from 1987-1999) air pollution, daily dewpoint temperature (4748 days from 1987 to 1999) and influenza (4748 days from 1987 to 1999) from the National Morbidity and Mortality and Air Pollution Study (NMMAPS) archive.

We ran our basic models with and without each of these covariates using the available 3 datasets (Supplemental Table 4-7). There were no changes in our key findings. Heat effects are presented as the percent difference in mortality for the 99<sup>th</sup> compared to the 95<sup>th</sup> percentile of temperature, whereas cold effects are presented by comparing the 1<sup>st</sup>

to the 5<sup>th</sup> percentile.

**Supplemental Table 4. Sensitivity of Heat and Cold Effects to Inclusion of PM10 at Lag 0 and Lag 2 Using Dataset 3**

|                      | Lag 0                    |                       | Lag 2                    |                       |
|----------------------|--------------------------|-----------------------|--------------------------|-----------------------|
|                      | Without PM <sub>10</sub> | With PM <sub>10</sub> | Without PM <sub>10</sub> | With PM <sub>10</sub> |
| Heat effect (95% CI) | 4.30(-4.23-13.60)        | 3.18(-6.47-13.82)     |                          |                       |
| Cold effect (95% CI) |                          |                       | 1.77(-5.86-10.02)        | 1.46(-6.15-9.70)      |

**Supplemental Table 5. Sensitivity of Heat Effect to Inclusion of Ozone at Lag 0 Using Dataset 2**

|                      | Lag 0           |                  |
|----------------------|-----------------|------------------|
|                      | Without Ozone   | With Ozone       |
| Heat effect (95% CI) | 3.71(0.19-7.37) | 2.90(-1.31-7.28) |

**Supplemental Table 6. Sensitivity of Cold Effect to Inclusion of influenza at Lag 2 Using Dataset 2**

|                      | Lag 2             |                  |
|----------------------|-------------------|------------------|
|                      | Without Influenza | With Influenza   |
| Cold effect (95% CI) | 1.31(-1.76-4.48)  | 1.31(-1.76-4.48) |

**Supplemental Table 7. Sensitivity of Heat Effect to Inclusion of dewpoint temperature at Lag 0 Using Dataset 2**

|                     | Lag 0                  |                                       |
|---------------------|------------------------|---------------------------------------|
|                     | Without<br>Temperature | Dewpoint<br>With Dewpoint Temperature |
| Heat effect(95% CI) | 3.71 (0.19-7.37)       | 3.53(-0.26-7.46)                      |

***Different Lag Structures for Heat and Cold Effects***

We have carried out new sensitivity analyses examining distributed lag effects for both heat and cold effects using dataset1(Supplemental Table 8). For heat, we re-ran our basic exposure-response analysis using the two-day moving average (lags 0 and 1) of temperature. For cold, we re-ran the analysis with five day (lags 0 through 4) and 10 day (lags 0 through 9) moving averages of temperature. There were small, non-meaningful differences in effect estimates from these alternative model forms which did not alter any of our key findings. Specifically, for the heat effect, the 0-1 day moving average yielded a slightly higher effect estimate than lag 0 alone. Neither the 5 nor 10 day moving average had a statistically significant effect on mortality, and the effect estimates were not dissimilar to that at lag 2 in our core analysis. Heat effects are presented as the percent difference in mortality for the 99<sup>th</sup> compared to the 95<sup>th</sup> percentile of temperature, whereas cold effects are presented by comparing the 1<sup>st</sup> to the 5<sup>th</sup> percentile.

**Supplemental Table 8. Sensitivity of Heat and Cold Effects to Comparison of**

**Different Lag Structures Using Dataset 1**

|                         | Lag 0               | Moving<br>Average 0-1 | Lag 2               | Moving<br>Average 0-4 | Moving<br>Average 0-9 |
|-------------------------|---------------------|-----------------------|---------------------|-----------------------|-----------------------|
| Heat effect<br>(95% CI) | 4.87<br>(1.84-8.00) | 5.74<br>(2.24-9.36)   |                     |                       |                       |
| Cold effect<br>(95% CI) |                     |                       | 1.56<br>(0.11-6.18) | 0.87<br>(-3.10-5.01)  | 2.09<br>(-3.17-7.64)  |

***Additional References:***

1. Davis, R. E., Knappenberger, P. C., Michaels, P. J. & Novicoff, W. M. Changing heat-related mortality in the United States. *Environ. Health Perspect.* 111, 1712-1718 (2003).
2. O'Neill, M. S., Zanobetti, A. & Schwartz, J. Modifiers of the temperature and mortality association in seven US cities. *Am. J. Epidemiol.* 157, 1074-1082 (2003).
3. Donaldson, G., Keatinge, W. & Näyhä, S. Changes in summer temperature and heat-related mortality since 1971 in North Carolina, South Finland, and Southeast England. *Environ. Res.* 91, 1-7 (2003).
4. O'Neill, M. S., Zanobetti, A. & Schwartz, J. Disparities by race in heat-related mortality in four US cities: the role of air conditioning prevalence. *J. Urban health* 82, 191-197 (2005).
5. Medina-Ramon, M. & Schwartz, J. Temperature, temperature extremes, and mortality: a study of acclimatisation and effect modification in 50 US cities. *Occup. environ. med.* 64, 827-833 (2007).
6. Global Climate Change Impacts in the United States, Thomas R. Karl, Jerry M. Melillo, and Thomas C. Peterson, (eds.). Cambridge University Press, 2009.
7. McMichael, A. et al. *Human health and climate change in Oceania: a risk assessment.* (Commonwealth Department of Health and Ageing: 2003).
8. Gosling, S. N., McGregor, G. R. & Lowe J. A. The benefits of quantifying



- climate model uncertainty in climate change impacts assessment: an example with heat-related mortality change estimates. *Climatic Change*. 112, 217-231 (2012).
9. Meehl, G. et al. The WCRP CMIP3 multi-model dataset: A new era in climate change research. *Bull. Amer. Meteor. Soc.* 88, 1383–1394 (2007).
  10. Hogrefe, C. et al. Simulating changes in regional air pollution over the eastern United States due to changes in global and regional climate and emissions. *J. Geophys. Res.* 109, D22301 (2004).
  11. Ballester, J., Rodó, R. & Giorgi, F. Future changes in Central Europe heat waves expected to mostly follow summer mean warming. *Clim. Dyn.* 35, 1191-1205(2009).
  12. *Census 2000 Summary File 1 (SF1) 100-Percent Data Detailed Tables* (US Census Bureau)
  13. *CDC Wonder Compressed Mortality File, Underlying Cause of Deaths* (Centers for Disease Control and Prevention)
